1  
2  
3  
4  
5  
6  
7  
8  
9  
10  
11  
12  
13  
14  
15  
16  
17  
18  
19  
20  
21  
22  
23  
24  
25  
26

# Ureterorenoscopic (URS) lithotripsy and balloon dilation cause acute kidney injury and distal renal tubule damage

Ho-Shiang Huang<sup>1</sup>, Chan-Jung Liu<sup>1,\*</sup>

1. Department of Urology, National Cheng Kung University Hospital, College of Medicine, National Cheng Kung University, Tainan, Taiwan.

\* Corresponding author

Email: [dragon2043@hotmail.com](mailto:dragon2043@hotmail.com)

## 27 **Abstract**

28 Ureterorenoscopy (URS) is believed to be a safe and effective procedure to treat ureteral stone  
29 or ureteral stricture. Rapidly increased intrarenal pressure during URS may have a negative impact  
30 on the kidney, but the effect on renal functions is not well known. The aim of this study is to  
31 evaluate whether URS balloon dilation or lithotripsy would cause acute kidney injury (AKI), which  
32 was evaluated by urine neutrophil gelatinase associated lipocalin (NGAL) and renal tubular  
33 damage, which was evaluated by urine  $\alpha$  glutathione S-transferase (GST) and  $\pi$ GST. This  
34 prospective study consisted of 207 patients with mean age 53.8 years old between September 2012  
35 and June 2013. Four groups were included: the ureteral stricture group (group 1), the ureteral stone  
36 group (group 2), and two control groups. URS induced increased uNGAL on both Days 1 and 14 in  
37 both groups, and only elevated u- $\pi$ GST levels were noted on Day 14 after URSL. On Day 14, the  
38 difference between low-grade and high-grade hydronephrosis was significant in group 1 ( $p < 0.001$ )  
39 rather than group 2 ( $p = 0.150$ ). By multivariate logistic regression analysis, age, baseline eGFR,  
40 and stone size  $> 1.0$  cm were associated with complete recovery of hydronephrosis after URS on  
41 Day 14. Ureteral stone patients with preserved renal function suffered more AKI (uNGAL) than  
42 those with impaired renal function. However, URS-related AKI had no significant difference  
43 between stone  $\leq 1$  cm and  $> 1$  cm subgroups. Besides, urine  $\alpha$ GST and  $\pi$ GST were both  
44 significantly higher in stone  $> 1$  cm subgroup when compared to  $\leq 1$  cm subgroup. In conclusion,  
45 URS laser lithotripsy and balloon dilatation all resulted in AKI and renal tubular damage on Day 14  
46 though post-URS double-J (DBJ) stenting was performed in every patient.

## 47 **Introduction**

48       Impairment of urinary flow due to the urinary tract obstruction, referred to obstructive  
49 uropathy, is a manifestation of a variety of kidney and ureteral disease [1]. The progression of renal  
50 function after relief of obstructive uropathy has been widely studied. When experimental animals  
51 undergo 24 hours (hr) of unilateral ureteral obstruction, a decline in renal hemodynamic and tubular  
52 function is found [1, 2]. Glomerular filtration rate (GFR) is directly affected by intrapelvic pressure  
53 and will decrease and actually become zero as pressure progressively increases, whereas renal blood  
54 flow does not respond directly to intrapelvic pressure [3]. Furthermore, calcium oxalate (CaOx)  
55 stone disease *per se* can induce renal tubular damage and renal interstitial fibrosis, which was found  
56 both in stone patients and experimental animals [4-6]. Therefore, more profound kidney damage is  
57 more likely to be found in patients with obstructive uropathy caused by a CaOx ureteral stone.

58       Ureterorenoscopic lithotripsy (URSL) is a safe, effective and less invasive method for the  
59 treatment of ureteral stones [7]. With advances in technology, ureterorenoscopy (URS) have  
60 evolved to a significantly smaller outer diameter. Good irrigation is vital for ureteral dilatation and  
61 instrument passage, and irrigation is required to provide a clear vision [8]. However, application of  
62 high-pressure irrigation during URS can cause accumulation of renal intrapelvic fluid and increases  
63 in intrapelvic pressure significantly [8]. High-pressure irrigation during URS can cause irreversible  
64 damage to the urothelium and renal parenchyma [9, 10]. In addition, ureteral stricture is another  
65 major cause of obstructive uropathy [11]. The same as ureteral stone, ureteral stricture is also  
66 associated with kidney injury and fibrosis [12]. Various managements of ureteral stricture can be

67 used based on urologists' preference and experience. Balloon dilation of the ureter is a  
68 well-accepted surgical technique to resolve ureteral stricture [13]. However, many urologists prefer  
69 internal stents, that are double-J stents (DBJ) in most circumstances, to treat ureteral stricture rather  
70 than balloon dilation because of the potential risk of ureteral injury. Taken together, although both  
71 ureteral stone or ureteral stricture are associated with kidney injury, it is still controversial whether  
72 the treatments of them, which are URSL and balloon dilation, attenuate or aggravate the kidney  
73 injury. Whether URSL or balloon dilation of the ureteral stricture cause more profound acute  
74 kidney injury (AKI) and renal tubular damage has not yet been fully investigated.

75 Neutrophil gelatinase-associated lipocalin (NGAL) has emerged as the most promising biomarker  
76 of AKI [14]. NGAL is a 21-kDa protein expressed in neutrophils and human epithelia and has a  
77 physiological role in iron transport, while regulating cell growth and differentiation [15]. Under  
78 various types of AKI, NGAL is secreted into urine from the ascending limb of the loop of Henle  
79 and the distal nephrons. Growing evidence has suggested that urine NGAL is an early and accurate  
80 biomarker to predict AKI [14, 16]. As in our previous studies, kidney stone disease is associated  
81 with renal tubule damage as well as lipid peroxidation [17, 18].  $\alpha$ -glutathione S-transferase ( $\alpha$ GST)  
82 is a cytosolic enzyme that has been proven to be a useful marker of chemically-induced tubular  
83 damage, particularly in the S3 segment of the proximal tubule [19].  $\pi$ GST is also a cytosolic  
84 enzyme and is mainly localized in the distal tubules and collecting ducts, and its presence in the  
85 proximal tubules is sparse [18].

86 In this prospective study, we investigated whether URSL or URS balloon dilation would cause

87 AKI (evaluated by urine NGAL level) and renal tubular damage (evaluated by urine  $\alpha$ GST and  
88  $\pi$ GST levels). We also evaluated the variables that contribute to complete recovery of  
89 hydronephrosis after URS surgery and the impact of hydronephrosis.

## 90 **Materials and methods**

91 The protocol of this prospective study was approved by the Institutional Ethics Review Board of  
92 National Taiwan University Hospital (Registry Number: 201205117RIC), and all subjects provided  
93 written informed consent.

## 94 **Study design and populations**

95 We prospectively enrolled patients from a single tertiary medical center between September  
96 2012 and June 2013. All patients were admitted for URS holmium: yttrium-aluminum-garnet (Ho:  
97 YAG) laser lithotripsy or balloon dilation because of diagnosed with acute unilateral  
98 hydronephrosis caused by ureteral stones or ureteral stricture, which was confirmed by renal  
99 ultrasonography, intravenous urography, or non-contrast computed tomography (CT). The  
100 exclusion criteria included patients with (1) previous urolithiasis history; (2) acute pyelonephritis or  
101 associated urinary tract infection; (3) pre-URSL nephrostomy tube insertion or currently indwelled;  
102 (4) hydronephrosis caused by infravesical obstruction, uterine myoma, malignancy, or other  
103 retroperitoneal etiology; (5) stone not containing any amount of CaOx based on the stone analysis;  
104 (6) other inflammatory or malignant diseases.

## 105 **Hydronephrosis classification**

106 The grade of hydronephrosis was classified according to Goertz JK and Lotterman S [22]:

107 grade 1 was defined as enlargement of the calices with preservation of the renal papillae; grade 2  
108 was defined as rounding of the calices with obliteration of the renal papillae; grade 3 was defined as  
109 caliceal ballooning with cortical thinning. All renal sonographic examinations and determination of  
110 the grade of hydronephrosis were performed by one urologist. The timing of post URS sonography  
111 was two weeks after surgery and after DBJ removal.

## 112 **Patient grouping**

113 In current study, all subjects were categorized into four groups: two study groups (ureter stone  
114 group and ureter stricture group) and two control groups (positive and negative). The diagnosis of  
115 obstructive uropathy was established via intravenous urography (IVU) or non-contrast CT scan 2-3  
116 weeks after their first outpatient department interviews. One week after the IVU or CT scan,  
117 patients returned to our outpatient department to confirm that the obstructive uropathy was  
118 associated with ureteral stones or ureteral stricture. All patients were enrolled into the ureteral  
119 stricture group (group 1) or ureteral stone group (group 2) based on the image results.

120 Serum and 24-hour urine samples were collected at three time periods: Pre-URS (baseline)  
121 sample was collected after overnight fasting, 1-day post-URS (Day 1) samples, and 2-week  
122 post-URSL (Day 14) samples were collected from all patients while they followed a normal diet.  
123 There was at least a 7-10 day interval between IVU examination and subsequent collection of blood  
124 and urine samples. The maximal stone length was assessed based on the images of IVU or  
125 abdominal CT.

126 In current study, we used two groups of controls: negative control (NC) and positive control

127 (PC). The NC, serving as the controls at the baseline status, were those who had unilateral ureteral  
128 stricture history with long-term unilateral DBJ catheter indwelling. A total of 14 patients were  
129 replaced with a 7 Fr. DBJ catheter under anesthesia, and there was no recurrence of ureteral  
130 stricture confirmed by URS and retrograde pyeloureterography at the same time. We used patients  
131 with unilateral renal staghorn stone and receiving percutaneous nephrolithotomy (PCNL) as the PC,  
132 and they served as the controls mainly at the post-URS period to investigate the impact of URS on  
133 the changes of these biomarkers. Before PCNL, the PC received URS with a 7 Fr. ureteral DBJ  
134 indwelling. The NC represented the patients without current evidence of obstructive uropathy.  
135 Otherwise, the PC represented those who got most severe renal injury because of inevitable renal  
136 volume damage during PCNL.

### 137 **The procedure of ureterorenoscopy**

138 In stone patients (group 2), the ureteral stone was disintegrated by the application of Ho:YAG  
139 laser (Odyssey, Convergent Laser Technologies, Alameda, CA,USA) through URS. After the  
140 ureteral stone had been disintegrated, ureteral patency was examined by URS to ensure that there  
141 was no ureteral injury caused by laser lithotripsy.

142 In ureteral stricture patients (group 1), high pressure balloon catheter (UroMAX Ultra, Boston  
143 Scientific, Natick, MA, USA) was applied to relieve the stricture. Balloon dilation was applied at  
144 least two times with balloon inflation pressure up to 18-20 atmosphere (ATM) for 5 minutes each  
145 time under fluoroscopy to ensure all segments of ureteral stricture were relieved.

## 146 **Biochemical analysis and renal function determination**

147 Serum creatinine (Cr) level was examined twice, which were the baseline and 2-week post  
148 URS, in every enrolled patient and the eGFR was calculated using the formula as  $186 \times (\text{Serum}$   
149  $\text{Cr})^{-1.154} \times (\text{age})^{-0.203} \times (0.742 \text{ if female}) \times (1.210 \text{ if African-American})$  [2, 3].

150 Commercial kits were used to determine the urine level of NGAL (NGAL ELISA Kit,  
151 BioPorto Diagnostics A/S, Copenhagen, Denmark) and the urine levels of stone-induced renal  
152 tubular damage markers; namely, the urinary  $\alpha$ GST (Alpha GST EIA, Argutus Medical, Dublin,  
153 Ireland), which is a marker of proximal tubular damage, and the  $\pi$ GST (Pi GST EIA, Argutus  
154 medical, Dublin, Ireland), which is a marker for distal tubular damage. Urinary  $\alpha$ GST and  $\pi$ GST  
155 were examined at baseline and 2-week post-URS (Day 14) and all assays were performed in  
156 duplicate. Urine NGAL (uNGAL) level was examined at three time periods: baseline, post-URS  
157 Day 1 and post-URS Day 14.

## 158 **Statistical analysis**

159 Continuous variables are presented as the mean values  $\pm$  standard deviation, whereas categorical  
160 variables are presented as frequencies. Two sample comparisons between kidney stone patients and  
161 controls were performed using the unpaired Student's *t*-test, Mann-Whitney *U*-test or Fisher's exact  
162 probability test, as appropriate. Comparisons across the three groups were done using the *chi* square  
163 test for categorical variables and by analysis of variance (ANOVA) or Kruskal–Wallis test for  
164 continuous variables depending on the distribution of the variable. Logistic regression was used for  
165 the univariate and multivariate analyses to identify factors having an effect on hydronephrosis



166 recovery (hydronephrosis degree = 0). Pearson's correlation coefficient ( $\gamma$ ) was used to assess the  
167 correlation between clinical variables. In all tests,  $p$  value  $<0.05$  was considered statistically  
168 significant.

## 169 Results

170 A total of 220 patients were enrolled in current study and mainly male patients (67.3%) with a  
171 mean age of 53.80 (Table 1). There was no significant different in age, eGFR, BMI and 24-hour  
172 urine output between these four groups. In group 1, the most common site of ureteral stricture was  
173 upper ureter (59.6%); whereas the most common location of ureteral stone was also upper ureter  
174 (56.0%). The mean maximal stone length was 0.9 cm.

175 Table 1. Clinical Characteristics of the study population.

|                                    | Negative control | Ureteral stricture (Group 1) | Ureteral stone (Group 2) | Positive control |
|------------------------------------|------------------|------------------------------|--------------------------|------------------|
| Number                             | 13               | 52                           | 141                      | 14               |
| Hydronephrosis (No.)               |                  |                              |                          |                  |
| Grade 0                            | 14               | 13                           | 5                        | 0                |
| Grade 1                            | 0                | 17                           | 61                       | 11               |
| Grade 2                            | 0                | 13                           | 58                       | 3                |
| Grade 3                            | 0                | 9                            | 17                       | 0                |
| Age, years                         | 51.7 $\pm$ 2.6   | 53.0 $\pm$ 2.0               | 54.5 $\pm$ 1.1           | 59.1 $\pm$ 2.7   |
| Male                               | 8 (61.5)         | 28 (53.8)                    | 101 (71.6)               | 11 (78.6)        |
| eGFR (mL/min/1.73 m <sup>2</sup> ) | 92.0 $\pm$ 6.6   | 87.0 $\pm$ 4.0               | 86.9 $\pm$ 3.5           | 85.1 $\pm$ 8.7   |
| BMI                                | 25.9 $\pm$ 1.2   | 24.6 $\pm$ 0.5               | 24.3 $\pm$ 2.1           | 24.5 $\pm$ 1.0   |
| Stone size (cm)                    | 0                | 0                            | 0.9 $\pm$ 0.5            | 5.4 $\pm$ 0.7    |
| Location (stone or                 |                  |                              |                          |                  |

|               |   |           |           |   |
|---------------|---|-----------|-----------|---|
| stricture)    |   |           |           |   |
| Upper ureter  | - | 31 (59.6) | 79 (56.0) | - |
| Middle ureter | - | 3 (5.8)   | 42 (29.8) | - |
| Lower ureter  | - | 18 (34.6) | 20 (14.2) | - |

176 Data expressed as mean  $\pm$  standard deviation or number (percent).

177 BMI: body mass index; eGFR: estimated glomerular filtration rate.

## 178 **The impact of different degree of hydronephrosis on kidney injury**

### 179 **biomarkers**

180 Table 2 shows the comparisons of different kidney injury biomarkers in different degree of

181 hydronephrosis in group 1 and group 2. To compare with the NC group, significantly elevated

182 uNGAL level was noted in stone patients (group 2) with moderate-to-severe hydronephrosis and

183 severe hydronephrosis in ureter stricture patients (group 1). Significant elevation of renal tubular

184 damage markers were also found in stone patients with moderate-to-severe hydronephrosis, but we

185 didn't find any difference in stricture patients. Interestingly, when compared with stricture patients,

186 the levels of u- $\alpha$ GST and u- $\pi$ GST were significantly higher in moderate-to-severe hydronephrosis

187 of stone patients; whereas there was no significant difference in uNGAL between groups.

188 **Table 2.** The impact of hydronephrosis on kidney injury, evaluated by acute kidney injury (AKI)

189 maker (NGAL) and renal tubular damage markers ( $\alpha$ GST,  $\pi$ GST) in group 1 (ureteral stricture) and

190 group 2 (ureteral stone) at baseline condition when compared to the negative controls.

---

#### **Part 1. Compared with negative controls (NC)**

---

| <b>NGAL</b>     | <b>P value</b> |                     | <b>P value</b> |
|-----------------|----------------|---------------------|----------------|
| stone H0 vs. NC | 0.456          |                     |                |
| stone H1 vs. NC | 0.153          | stricture H1 vs. NC | 0.113          |
| stone H2 vs. NC | <b>0.035</b>   | stricture H2 vs. NC | 0.390          |

|                               |              |                     |              |
|-------------------------------|--------------|---------------------|--------------|
| stone H3 vs. NC               | <b>0.006</b> | stricture H3 vs. NC | <b>0.007</b> |
| <b><math>\alpha</math>GST</b> |              |                     |              |
| stone H0 vs. NC               | 0.241        |                     |              |
| stone H1 vs. NC               | 0.058        | stricture H1 vs. NC | 0.385        |
| stone H2 vs. NC               | <b>0.002</b> | stricture H2 vs. NC | 0.848        |
| stone H3 vs. NC               | <b>0.000</b> | stricture H3 vs. NC | 0.352        |
| <b><math>\pi</math>GST</b>    |              |                     |              |
| stone H0 vs. NC               | 0.332        |                     |              |
| stone H1 vs. NC               | 0.059        | stricture H1 vs. NC | 0.080        |
| stone H2 vs. NC               | <b>0.007</b> | stricture H2 vs. NC | 0.604        |
| stone H3 vs. NC               | <b>0.000</b> | stricture H3 vs. NC | 0.440        |

---

**Part 2. Compared between ureteral stone (group 2) and ureteral stricture (group 1)**

---

| <b>NGAL</b>                   | <b>P value</b> |
|-------------------------------|----------------|
| Stone H1 vs. Stricture H1     | 0.153          |
| Stone H2 vs. Stricture H2     | 0.219          |
| Stone H3 vs. Stricture H3     | 0.452          |
| <b><math>\alpha</math>GST</b> |                |
| Stone H1 vs. Stricture H1     | 0.064          |
| Stone H2 vs. Stricture H2     | <b>0.000</b>   |
| Stone H3 vs. Stricture H3     | <b>0.000</b>   |
| <b><math>\pi</math>GST</b>    |                |
| Stone H1 vs. Stricture H1     | 0.051          |
| Stone H2 vs. Stricture H2     | <b>0.003</b>   |
| Stone H3 vs. Stricture H3     | <b>0.000</b>   |

---

191 Bold value represents statistically significant  $p < 0.05$ .

192 NC, negative control; H0, grade 0 hydronephrosis; H1, grade 1 hydronephrosis; H2, grade 2  
193 hydronephrosis; H3, grade 3 hydronephrosis.

194 **Changes in urine NGAL,  $\alpha$ GST, and  $\pi$ GST levels at different time**  
195 **periods**

196 In the ureter stricture group, uNGAL increased significantly on Day 1 and 14 when compared  
197 to the baseline, but there was no significant difference between Days 1 and 14 (Fig 1A). However,  
198 we didn't find any significant increase in u- $\alpha$ GST and u- $\pi$ GST on Day 14 comparing to the

199 baseline.

200 **Fig 1. (A, B)** Changes in urine NGAL,  $\alpha$ GST, and  $\pi$ GST levels at baseline, Day 1, and Day 14 after  
201 URS in both groups; **(C)** Correlation between baseline hydronephrosis grade and baseline eGFR in  
202 all cohorts.

203 In the ureter stone group, we also found the similar result as the stricture group, that was  
204 significant elevated uNGAL on Day 1 and 14 when compared to baseline (Fig 1B). Most  
205 importantly, no matter in the group 1 and group 2, there was no significant decrease in the uNGAL  
206 from Day 1 to 14, which indicated the injury of kidney related to URS surgery persisted for at least  
207 two weeks. On the other hand, u- $\pi$ GST level increased significantly on day 14 in the stricture  
208 group, but the elevation was not noted in u- $\alpha$ GST.

209 Larger stone may cause more severe obstruction of kidney and more severe kidney injury.  
210 Hence, we investigated the impact of stone size on the changes of urinary biomarkers (S1 Fig). The  
211 change of uNGAL at different time periods was nearly the same in both ureteral stone  $\leq 1$  cm and  $>$   
212 1cm subgroups. However, only in the ureteral stone  $\leq 1$  cm subgroup, the level of u- $\pi$ GST was  
213 significantly elevated on Day 14 comparing with the baseline, and no difference between the  
214 baseline and Day 14 was found in u- $\alpha$ GST. We further compared three urinary biomarkers between  
215 the ureteral stone  $\leq 1$  cm and  $> 1$ cm subgroups. The baseline levels of uNGAL and u- $\alpha$ GST  
216 revealed significant difference between stone size  $\leq 1$  cm and  $> 1$ cm subgroups, and the level was  
217 significantly higher in the larger stone size group (S1 Fig). However, there was no significant  
218 difference in the baseline level of u- $\pi$ GST but only a non-significant trend ( $p=0.085$ ) (S1 Fig 1).

219 By Pearson correlation analysis, we found that baseline eGFR and baseline hydronephrosis  
 220 grade had an inverse correlation significantly ( $\gamma = -0.213$ ,  $p = 0.001$ ) (Fig 1C).

## 221 Predictors of complete recovery of hydronephrosis after URS

222 We conducted univariate and multivariate logistic regression analysis to find the predictors of  
 223 complete recovery of hydronephrosis after URS (Table 3). We found that only three factors,  
 224 including age (OR = 0.96,  $p = 0.002$ ), baseline eGFR (OR = 1.04,  $p < 0.001$ ), and stone size > 1.0  
 225 cm (OR = 2.56,  $p = 0.024$ ), had a statistically significant effect on complete recovery of  
 226 hydronephrosis after URS and after DBJ removal.

227 **Table 3.** Univariate and multivariate logistic regression analysis for the predictors of complete  
 228 recovery of hydronephrosis (hydronephrosis grade = 0 on Day 14 after DBJ removal) after URS.

|                               | Univariate        |                | Multivariate      |                |
|-------------------------------|-------------------|----------------|-------------------|----------------|
|                               | OR (95% CI)       | <i>p</i> value | OR (95% CI)       | <i>p</i> value |
| Age , years                   | 0.97 (0.95, 0.99) | 0.005*         | 0.96 (0.94, 0.99) | 0.002*         |
| Female (vs Male)              | 0.76 (0.42, 1.36) | 0.354          |                   |                |
| Group (vs ureteral stricture) |                   |                |                   |                |
| Ureteral stone                | 2.49 (0.30, 4.77) | 0.246          |                   |                |
| Staghorn stone                | 2.92 (0.81, 10.5) | 0.102          |                   |                |
| Stone position                |                   |                |                   |                |
| Upper                         | 0.62 (0.18, 2.11) | 0.448          |                   |                |
| Middle                        | 0.70 (0.16, 2.98) | 0.630          |                   |                |
| Lower                         | 0.71 (0.20, 2.53) | 0.596          |                   |                |
| eGFR (Baseline)               | 1.02 (1.01, 1.03) | 0.004*         | 1.04 (1.02, 1.06) | <0.001*        |
| BMI (kg/m <sup>2</sup> )      |                   |                |                   |                |
| 18.5-24 (vs ≤ 18.5)           | 2.17 (0.40, 11.8) | 0.371          |                   |                |
| 24-30 (vs ≤ 18.5)             | 1.43 (0.28, 7.38) | 0.670          |                   |                |
| >30 (vs ≤ 18.5)               | 2.57 (0.42, 15.9) | 0.310          |                   |                |
| Stone size                    |                   |                |                   |                |
| 0.4-1.0 (vs <0.4)             | 2.22 (1.06, 4.66) | 0.035*         | 1.90 (0.81, 4.44) | 0.138          |

|                         |                   |        |                   |        |
|-------------------------|-------------------|--------|-------------------|--------|
| >1.0 (vs <0.4)          | 2.15 (1.07, 4.30) | 0.031* | 2.56 (1.13, 5.77) | 0.024* |
| Presence of UTI         | 0.91 (0.51, 1.63) | 0.742  |                   |        |
| NGAL(Baseline)          | 1.00 (1.00, 1.00) | 0.357  |                   |        |
| $\pi$ GST (Baseline)    | 1.06 (0.77, 1.45) | 0.744  |                   |        |
| $\alpha$ GST (Baseline) | 0.83 (0.42, 1.66) | 0.599  |                   |        |
| Cr (Baseline)           | 1.02 (0.99, 1.04) | 0.203  |                   |        |

229 Moreover, we investigated the effects of different degrees of hydronephrosis on kidney injury  
 230 and renal function (Table 4). Each group was stratified into H0+H1 and H2+H3 subgroups. There  
 231 was no significant difference in eGFR between the two subgroups on baseline and Day 14 in each  
 232 group. It is worthy to mention that no significant difference in uNGAL between all H2+H3 patients  
 233 and PC on Day 1, which indicated URS surgery may cause comparable kidney injury as PCNL.  
 234 Interestingly, till Day 14, the uNGAL from H2+H3 ureteral stricture patient was as high as PC.  
 235 **Table 4.** Impact of hydronephrosis degree on eGFR, AKI marker, and urinary kidney damage  
 236 markers in each group.

|                                               | Ureteral stricture |             | Ureteral stone |             | Positive control |
|-----------------------------------------------|--------------------|-------------|----------------|-------------|------------------|
|                                               | H0+H1              | H2+H3       | H0+H1          | H2+H3       |                  |
| <b>eGFR</b><br>(mL/min/1.73 m <sup>2</sup> )  |                    |             |                |             |                  |
| Baseline                                      | 90.7±4.7           | 79.4±6.7    | 82.5±3.1       | 76.7±3.1*   | 89.4±6.6         |
| P value                                       | 0.192              |             | 0.323          |             |                  |
| Day 14                                        | 92.7±4.3           | 79.6±8.1    | 87.7±3.4       | 81.2±3.3    | 83.3±6.2         |
| P value                                       | 0.176              |             | 0.223          |             |                  |
| <b>NGAL</b><br>(ng/mL)                        |                    |             |                |             |                  |
| Baseline                                      | 13.6±2.8*          | 54.0±16.6   | 19.3±4.4*      | 36.1±8.8    | 65.6±16.4        |
| P value                                       | 0.125              |             | 0.146          |             |                  |
| Day 1                                         | 33.2±10.9*         | 72.4±20.3   | 49.1±9.6*†     | 71.4±9.6†   | 95.7±24.6        |
| P value                                       | 0.017              |             | 0.004          |             |                  |
| Day 14                                        | 18.5±3.5*          | 105.0±25.6† | 48.4±10.7*†    | 60.5±11.4*† | 137.6±36.3†      |
| P value                                       | <0.001             |             | 0.150          |             |                  |
| <b><math>\alpha</math>GST</b><br>( $\mu$ g/L) |                    |             |                |             |                  |

|                |         |         |                      |                 |         |
|----------------|---------|---------|----------------------|-----------------|---------|
| Baseline       | 2.1±0.2 | 2.0±0.1 | 2.0±0.1              | 1.9±0.1         | 2.2±0.3 |
| <i>P</i> value | 0.684   |         | 0.326                |                 |         |
| Day 14         | 3.6±0.8 | 2.3±0.3 | <b>2.0±0.1*</b>      | <b>2.1±0.2*</b> | 2.5±0.1 |
| <i>P</i> value | 0.131   |         | 0.714                |                 |         |
| <b>πGST</b>    |         |         |                      |                 |         |
| (μg/L)         |         |         |                      |                 |         |
| Baseline       | 3.0±0.2 | 3.0±0.3 | 2.7±0.2              | 3.0±0.2         | 2.9±0.6 |
| <i>P</i> value | 0.490   |         | 0.691                |                 |         |
| Day 14         | 3.7±0.3 | 3.1±0.2 | 3.4±0.2 <sup>†</sup> | 3.5±0.3         | 3.2±0.7 |
| <i>P</i> value | 0.289   |         | 0.476                |                 |         |

237 H0, hydronephrosis grade 0; H1, hydronephrosis grade 1; H2, hydronephrosis grade 2; H3,

238 hydronephrosis grade 3; NAGL, neutrophil gelatinase-associated lipocalin; GST, glutathione

239 S-transferase.

240 *P* value: the statistical result after analyzed by analysis of variance (ANOVA) in each group.

241 \*  $p < 0.05$  when compared with positive control at the same time period.

242 Bold value represent statistically significant  $p < 0.05$ .

243 <sup>†</sup>  $p < 0.05$  when compared with baseline data in the same subgroup.

## 244 **The impact of baseline eGFR on kidney injury**

245 We evaluated the changes in different urine biomarkers ( $\Delta$ ) in baseline eGFR  $\geq 60$  and eGFR <

246 60 subgroups in both groups (S1 table). The changes were defined as the level of Day 14 minus the

247 level of baseline. Only  $\Delta$ NGAL of ureter stone group was significantly higher in eGFR  $\geq 60$

248 subgroup than eGFR < 60 subgroup.  $\Delta\alpha$ GST and  $\Delta\pi$ GST had no significant difference between

249 these two subgroups in both study groups.

## 250 **Discussion**

251 The present study revealed that no matter in patients with ureteral stones or ureteral stricture,  
252 URS surgery would induce AKI and the impact persisted for at least 14 days. The impact of  
253 URS-induced kidney injury, which was indicated by elevated uNGAL in the present study, was  
254 more prominent in moderate-to-severe hydronephrosis. In ureteral stone patients with normal renal  
255 function ( $eGFR \geq 60$ ), uNGAL increased apparently 14 days after URS compared with those with  
256 poor renal function ( $eGFR < 60$ ). However, compared with different size of ureter stones, the  
257 degree of URS-induced kidney injury was not significantly different.

## 258 **URSL and URS balloon dilatation definitely cause AKI**

259 URS is defined as endoscopic visualization of ureter and renal pelvis for diagnostic and/or  
260 therapeutic purposes. Indications for URS include both diagnostic and therapeutic interventions for  
261 stone disease, strictures, and ureter tumors in different patient groups [20]. URS is thought to be a  
262 safe and effective surgery for treatment of ureteral stones, but the optimal duration and indication  
263 for post-URS stenting is controversial. Some authors suggested that post-URS DBJ stent be only  
264 used in patients who are at an increased risk of complications, such as previous iatrogenic trauma,  
265 impacted ureter calculi, ureter perforation, and under some medical conditions such as solitary  
266 kidney, pregnancy, and a history of retroperitoneal fibrosis. Most urologists may favor its use for 1–  
267 2 weeks after URS [20, 21]. Our results suggested that even after DBJ indwelling for 2 weeks,  
268 URS-induced AKI still persisted no matter in ureteral stone patients or in ureteral stricture patients.  
269 Besides, most noteworthy in the present study is that we used negative and positive controls to  
270 assist our interpretations of the results. The negative controls represented no obstructive uropathy,



271 and we compared two study groups with negative controls to validate whether these urinary  
272 biomarkers do increase under these clinical conditions. Our results actually proved that both ureter  
273 stone and stricture patients with higher degree of hydronephrosis had higher levels of all urinary  
274 biomarkers. Furthermore, we used PCNL patients as the positive controls because PCNL is known  
275 to create a renal tract to assess intra-pelvic renal stones and it certainly cause considerable kidney  
276 injury. There are two interesting finding regarding positive controls. First, although we didn't see  
277 any decrease in the baseline eGFR from positive controls, the baseline level of uNGAL already  
278 significantly increased in positive controls compared with mild obstructive uropathy patients in both  
279 groups. It indicated that the existence of renal stones would lead to progressive renal injury. Second,  
280 in the ureter stricture group with moderate-to-severe hydronephrosis, uNGAL nearly doubled 14  
281 days after URS, which was similar as the positive controls. The level of uNGAL on day 14 in the  
282 ureter stricture group with moderate-to-severe hydronephrosis was over 100 ng/mL, even higher  
283 than the level on day 1 in positive controls. This finding was not noted In other patients, whereas  
284 uNGAL decreased 14 days after a peak in post-URS day 1 in other patients. The possible  
285 explanation of this result may be that patients with moderate-to-severe hydronephrosis usually have  
286 more stricture and tortuous ureters. The higher severity of ureter stricture definitely increases the  
287 difficulty and operation time of URS. However, there was no obvious influence on renal tubule  
288 damage after URS except that u- $\pi$ GST significantly increased in ureteral stone patients with mild  
289 hydronephrosis.

## 290 **URS procedure causes AKI and tubular damage**

291 Irrigation during URS increases renal pelvic pressure (RPP), possibly leading to intrarenal,  
292 pyelo-venous, and pyelo-lymphatic backflow as well as kidney injury [9]. Elevated RPP is noted to  
293 be harmful to the kidney in a mini-pig experimental model, and Schwalb et al found that  
294 high-pressure irrigation during URS caused irreversible, harmful effects in the kidney, and even  
295 moving the URS in the ureter without any irrigation could increase RPP by 20-25 mmHg [22].  
296 Long-term consequence of high RPP (>200 cm H<sub>2</sub>O) caused by high-pressure irrigation is related to  
297 columnar metaplasia, subepithelial nests and pericalyceal vasculitis in calyces as compared with  
298 those subjected to low irrigant pressure 4-6 weeks after experiment [22]. Our results are compatible  
299 with previous studies, which the URS procedure would induce kidney injury, and the elevation in  
300 uNGAL can be found as early as 1 hour after URS surgery [23]. URS-related tubular damage is  
301 limited to distal tubule and collecting duct in the ureteral stone patients, and our results are  
302 consisted with the finding that excessively high collecting system pressure induced renal cellular  
303 injury, as reflected by an increase in urinary N-acetyl-β-D-glucosaminidase levels (non-specific  
304 renal tubular marker) [24].

## 305 **Ureter Balloon dilation may cause more AKI than Ho:YAG laser** 306 **lithotripsy**

307 High-grade hydronephrosis (H2+H3) caused more AKI on Day 1 as noted in both study  
308 groups, and even more AKI was present on Day 14 in the H2+H3 subgroup of ureter stricture group  
309 (Table 4). This result implied that URS balloon dilation may cause more AKI than URSL in the

310 high-grade hydronephrosis patients on Day 14. Acute high RPP (>200 cmH<sub>2</sub>O) not only causes  
311 diffuse denudation and flattening of the caliceal urothelium, submucosal edema and congestion  
312 [22], but also causes renal tubule dilation and renal glomerulus compression [25]. This may be the  
313 reason why the elevated uNGAL levels in the ureteral stricture group were as high as those in the  
314 PCNL group (PC), known to have a sudden and rapid increase in RPP and direct renal parenchymal  
315 injury during the procedure. On the contrary, the mechanism of Ho:YAG laser lithotripsy is through  
316 photothermal effects with minimal upward migration of ureteral stone during procedure. Though  
317 intermittent normal saline irrigation by hand-held syringe during Ho:YAG laser lithotripsy, there  
318 will be no renal injury when the RPP was maintained under 120 cmH<sub>2</sub>O (around 88 mmHg) [22]. In  
319 a recent porcine experimental study, under gravity irrigation and manual pumping, the maximal  
320 RPP during URS reached 30 and 105 cmH<sub>2</sub>O, respectively, which were all lower than 120 cmH<sub>2</sub>O  
321 [8]. Therefore, in our current study, the uNGAL level on Day 14 in ureteral stone group was  
322 significantly lower than both the ureteral stricture group and PCNL group. Besides, only the H2+H3  
323 subgroup of ureter stricture group had persistent elevated uNGAL levels on Day 1 to Day 14, which  
324 was also seen in PCNL group patients. This interesting finding suggests the effect of URS produce  
325 for severe ureteral stricture complicated with high-grade hydronephrosis may cause prolonged  
326 kidney injury.

## 327 **The severity of hydronephrosis affects post-URS AKI, but not tubule** 328 **damage**

329 The kidney is the organ with highest blood flow in the human body, which receives

330 approximately one fourth of the cardiac output. Obstructive nephropathy refers to anatomical or  
331 functional obstruction of the kidney and leads to progressive kidney injury. Using CT perfusion  
332 image, Cai et al. found that significantly decrease in blood flow in both renal cortex and medulla  
333 from the obstructive kidney of moderate and severe unilateral ureteral obstruction (UUO); whereas  
334 there was no significantly difference in mean blood flow, blood volume, and clearance in the  
335 obstructive kidney of mild UUO [26]. This finding suggested that mild dilation of pelvis and calyx  
336 is not enough to deteriorate the renal function. This is why H0 and H1 hydronephrosis in both  
337 groups 1 and 2 had no significant uNGAL elevation after URS from baseline to Day 14, and the  
338 patients with H2 and H3 hydronephrosis had the same severity of uNGAL elevation on Day 1 when  
339 compared to the PCNL group. However, mean u- $\alpha$ GST and u- $\pi$ GST levels were not influenced by  
340 URS surgery in both study groups, which implied these three urinary cytokines represented the  
341 different types of kidney injury.

## 342 **Conclusions**

343 Although eGFR didn't significantly change after URS surgery, uNGAL persisted elevation for  
344 two weeks in both ureteral stricture and ureteral stone groups, which suggested that URS  
345 procedures could cause kidney injury. With respect to renal tubular damage marker, only u- $\pi$ GST  
346 was elevated on Day 14 in the ureteral stone group. Ureteral stone patients with preserved renal  
347 function suffered more uNGAL changes (i.e.  $\Delta$ NGAL) after URS. Taken together, both URSL and  
348 URS balloon dilation could lead to kidney injury and renal distal tubule damage till two weeks even  
349 though DBJ indwelling continued in both groups.

## 350 **References**

- 351 1. Ma MC, Huang HS, Chen CF. Impaired renal sensory responses after unilateral ureteral  
352 obstruction in the rat. *J Am Soc Nephrol.* 2002;13(4):1008-16.
- 353 2. Harris RH, Yarger WE. Renal function after release of unilateral ureteral obstruction in rats.  
354 *Am J Physiol.* 1974;227(4):806-15.
- 355 3. Ulrich JC, York JP, Koff SA. The renal vascular response to acutely elevated intrapelvic  
356 pressure: resistive index measurements in experimental urinary obstruction. *J Urol.*  
357 1995;154(3):1202-4.
- 358 4. Tsujihata M. Mechanism of calcium oxalate renal stone formation and renal tubular cell injury.  
359 *Int J Urol.* 2008;15(2):115-20.
- 360 5. Duan X, Kong Z, Mai X, Lan Y, Liu Y, Yang Z, et al. Autophagy inhibition attenuates  
361 hyperoxaluria-induced renal tubular oxidative injury and calcium oxalate crystal depositions in the  
362 rat kidney. *Redox Biol.* 2018;16:414-25.
- 363 6. Huang HS, Liao PC, Liu CJ. Calcium Kidney Stones are Associated with Increased Risk of  
364 Carotid Atherosclerosis: The Link between Urinary Stone Risks, Carotid Intima-Media Thickness,  
365 and Oxidative Stress Markers. *J Clin Med.* 2020;9(3).
- 366 7. Hofmann R. [Ureteroscopy (URS) for ureteric calculi]. *Urologe A.* 2006;45(5):W637-46; quiz  
367 W47.
- 368 8. Noureldin YA, Kallidonis P, Ntasiotis P, Adamou C, Zazas E, Liatsikos EN. The Effect of  
369 Irrigation Power and Ureteral Access Sheath Diameter on the Maximal Intra-Pelvic Pressure During  
370 Ureteroscopy: In Vivo Experimental Study in a Live Anesthetized Pig. *J Endourol.*  
371 2019;33(9):725-9.
- 372 9. Tokas T, Herrmann TRW, Skolarikos A, Nagele U, Training, Research in Urological S, et al.  
373 Pressure matters: intrarenal pressures during normal and pathological conditions, and impact of  
374 increased values to renal physiology. *World J Urol.* 2019;37(1):125-31.
- 375 10. Tokas T, Skolarikos A, Herrmann TRW, Nagele U, Training, Research in Urological S, et al.  
376 Pressure matters 2: intrarenal pressure ranges during upper-tract endourological procedures. *World*  
377 *J Urol.* 2019;37(1):133-42.
- 378 11. Gnessin E, Yossepowitch O, Holland R, Livne PM, Lifshitz DA. Holmium laser  
379 endoureterotomy for benign ureteral stricture: a single center experience. *J Urol.*  
380 2009;182(6):2775-9.
- 381 12. Washino S, Hosohata K, Miyagawa T. Roles Played by Biomarkers of Kidney Injury in  
382 Patients with Upper Urinary Tract Obstruction. *Int J Mol Sci.* 2020;21(15).
- 383 13. Kuntz NJ, Neisius A, Tsivian M, Ghaffar M, Patel N, Ferrandino MN, et al. Balloon Dilation  
384 of the Ureter: A Contemporary Review of Outcomes and Complications. *J Urol.* 2015;194(2):413-7.
- 385 14. Siew ED, Ware LB, Gebretsadik T, Shintani A, Moons KG, Wickersham N, et al. Urine  
386 neutrophil gelatinase-associated lipocalin moderately predicts acute kidney injury in critically ill  
387 adults. *J Am Soc Nephrol.* 2009;20(8):1823-32.

- 388 15. Schmidt-Ott KM, Mori K, Li JY, Kalandadze A, Cohen DJ, Devarajan P, et al. Dual action of  
389 neutrophil gelatinase-associated lipocalin. *J Am Soc Nephrol*. 2007;18(2):407-13.
- 390 16. Yang HN, Boo CS, Kim MG, Jo SK, Cho WY, Kim HK. Urine neutrophil  
391 gelatinase-associated lipocalin: an independent predictor of adverse outcomes in acute kidney  
392 injury. *Am J Nephrol*. 2010;31(6):501-9.
- 393 17. Huang HS, Ma MC. High Sodium-Induced Oxidative Stress and Poor Anticrystallization  
394 Defense Aggravate Calcium Oxalate Crystal Formation in Rat Hyperoxaluric Kidneys. *PLoS One*.  
395 2015;10(8):e0134764.
- 396 18. Ma MC, Chen YS, Huang HS. Erythrocyte oxidative stress in patients with calcium oxalate  
397 stones correlates with stone size and renal tubular damage. *Urology*. 2014;83(2):510 e9-17.
- 398 19. Walshe CM, Odejaye F, Ng S, Marsh B. Urinary glutathione S-transferase as an early marker  
399 for renal dysfunction in patients admitted to intensive care with sepsis. *Crit Care Resusc*.  
400 2009;11(3):204-9.
- 401 20. Whitehurst LA, Somani BK. Semi-rigid ureteroscopy: indications, tips, and tricks. *Urolithiasis*.  
402 2018;46(1):39-45.
- 403 21. Somani BK, Giusti G, Sun Y, Osther PJ, Frank M, De Sio M, et al. Complications associated  
404 with ureterorenoscopy (URS) related to treatment of urolithiasis: the Clinical Research Office of  
405 Endourological Society URS Global study. *World J Urol*. 2017;35(4):675-81.
- 406 22. Schwalb DM, Eshghi M, Davidian M, Franco I. Morphological and physiological changes in  
407 the urinary tract associated with ureteral dilation and ureteropyeloscopy: an experimental study. *J*  
408 *Urol*. 1993;149(6):1576-85.
- 409 23. Benli E, Ayyildiz SN, Cirrik S, Noyan T, Ayyildiz A, Cirakoglu A. Early term effect of  
410 ureterorenoscopy (URS) on the Kidney: research measuring NGAL, KIM-1, FABP and CYS C  
411 levels in urine. *Int Braz J Urol*. 2017;43(5):887-95.
- 412 24. Fung LC, Atala A. Constant elevation in renal pelvic pressure induces an increase in urinary  
413 N-acetyl-beta-D-glucosaminidase in a nonobstructive porcine model. *J Urol*. 1998;159(1):212-6.
- 414 25. Wang J, Zhou DQ, He M, Li WG, Pang X, Yu XX, et al. Effects of renal pelvic high-pressure  
415 perfusion on nephrons in a porcine pyonephrosis model. *Exp Ther Med*. 2013;5(5):1389-92.
- 416 26. Cai XR, Zhou QC, Yu J, Feng YZ, Xian ZH, Yang WC, et al. Assessment of renal function in  
417 patients with unilateral ureteral obstruction using whole-organ perfusion imaging with 320-detector  
418 row computed tomography. *PLoS One*. 2015;10(4):e0122454.

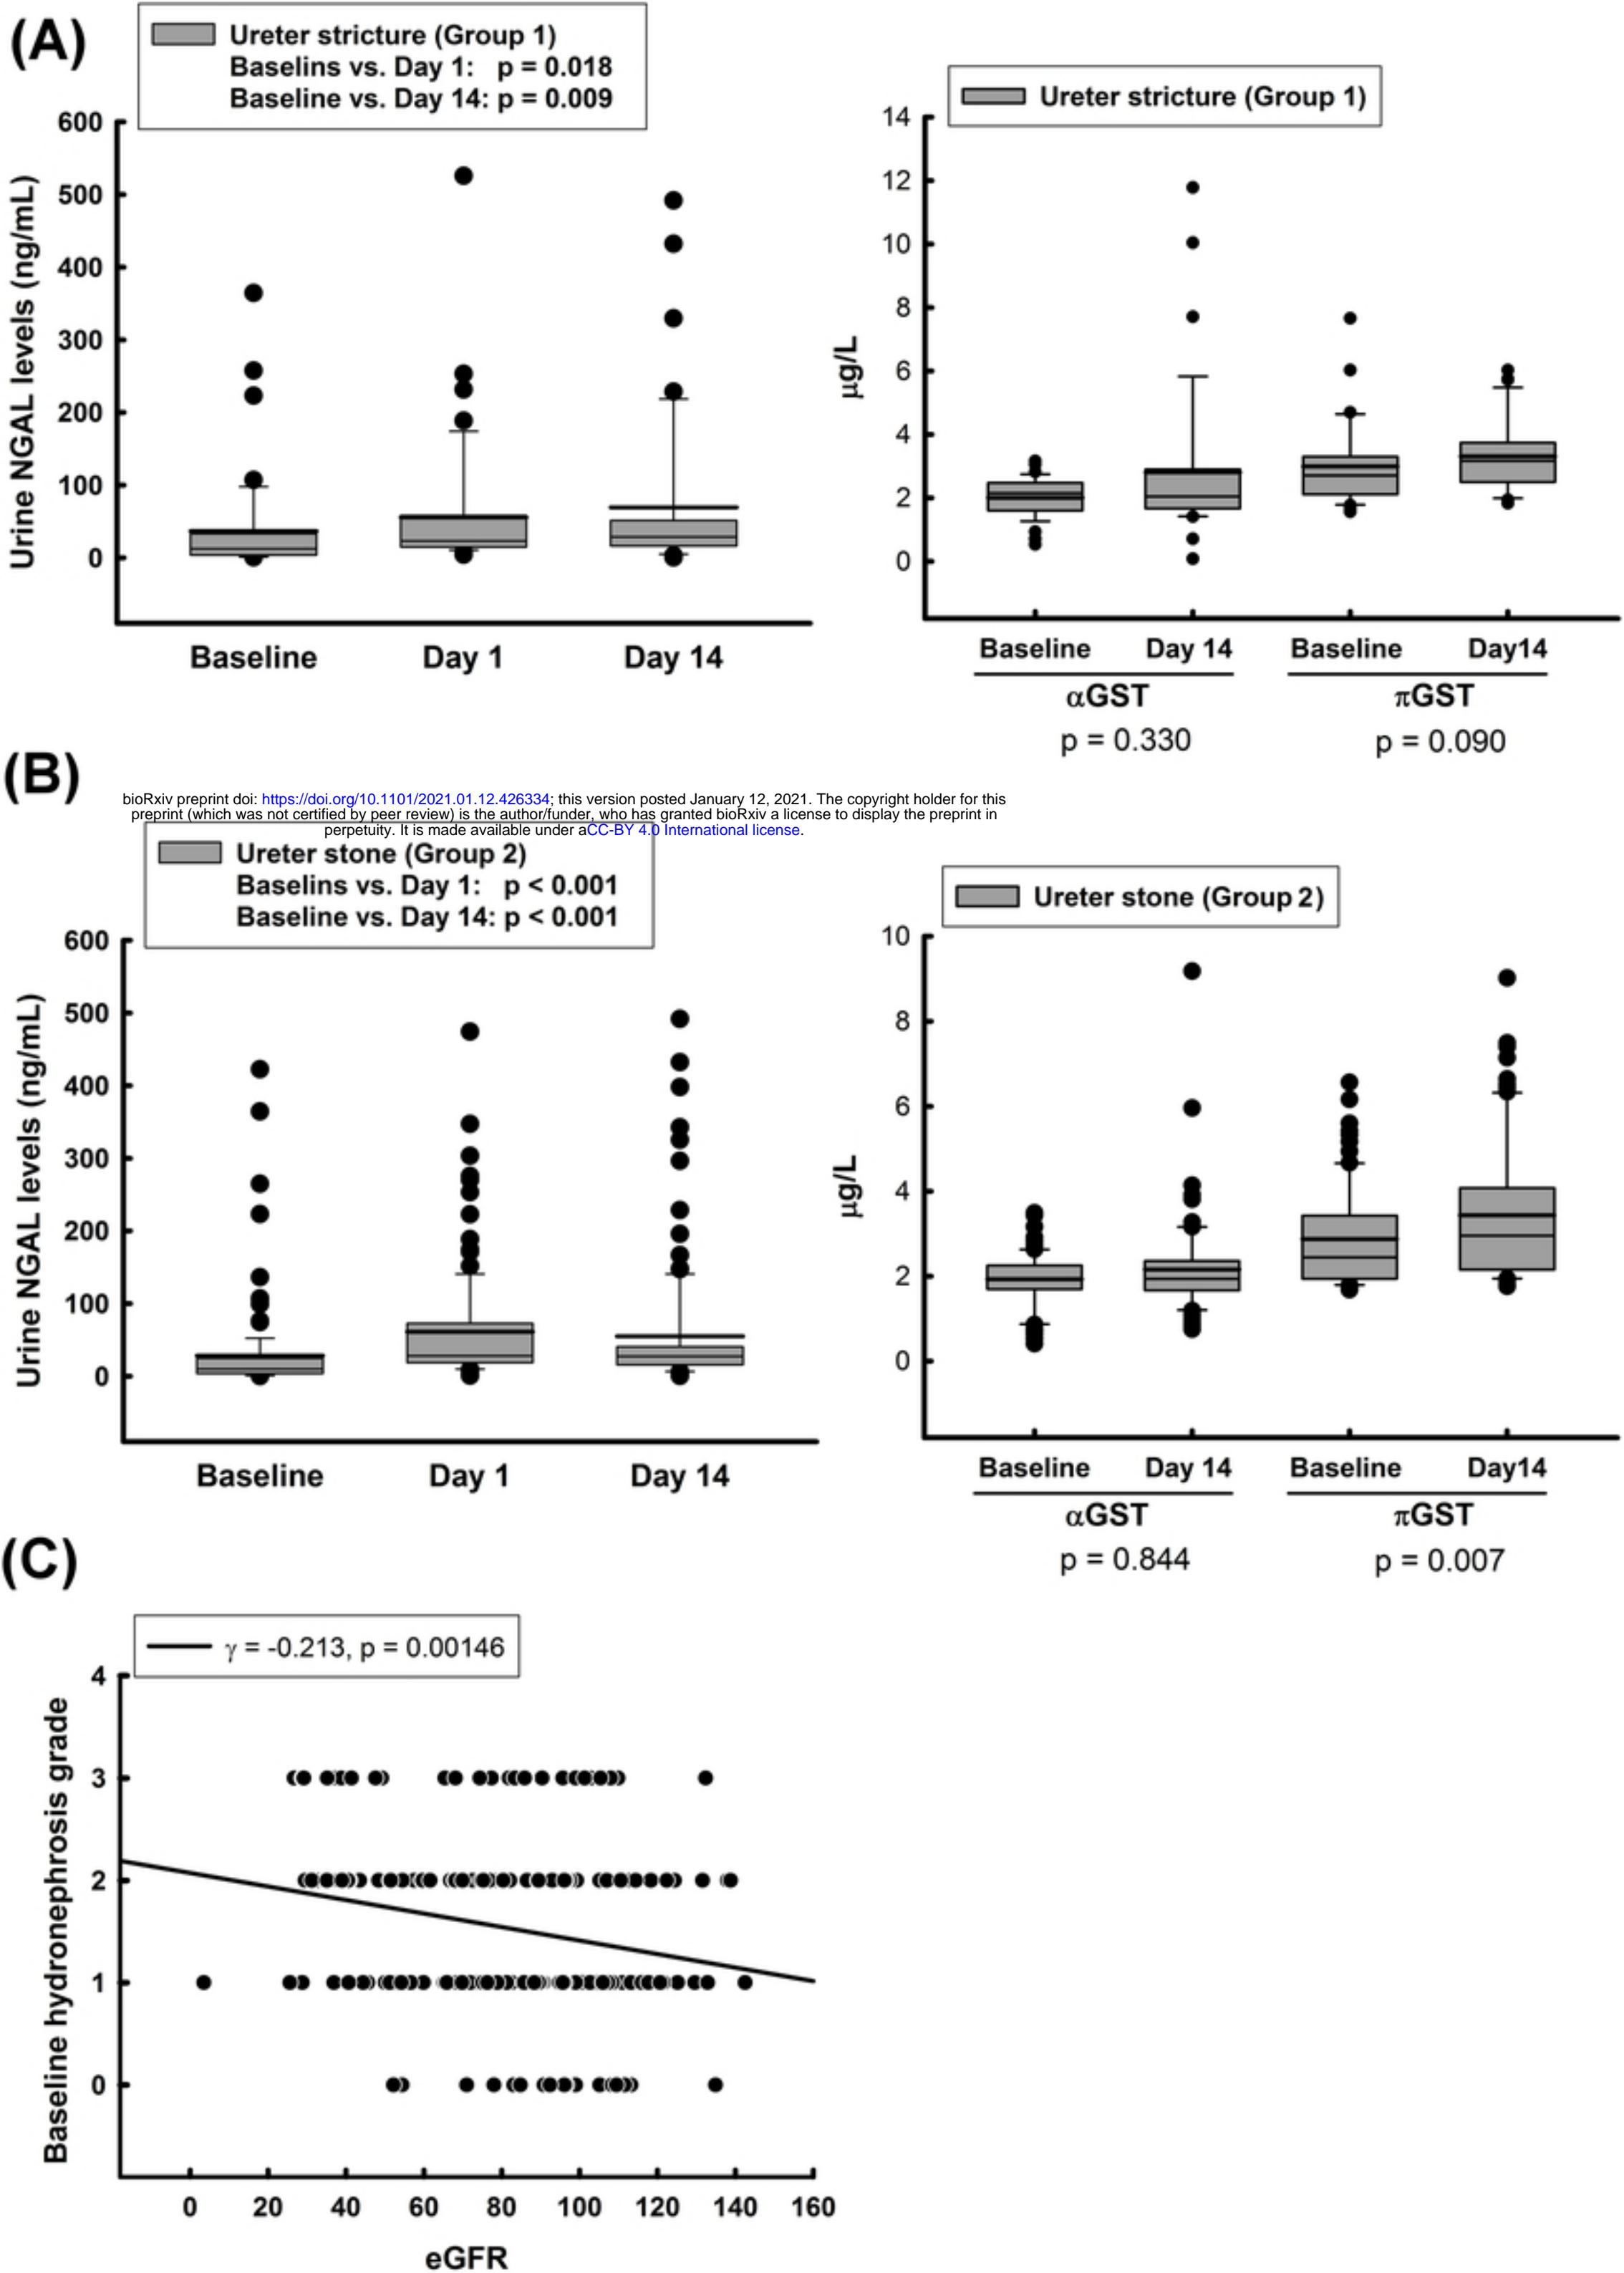

Figure 1
